# Supplementary material for: Effects of Family-to-Family Psychoeducation Among Relatives of Patients With Severe Mental Disorders in Mexico City
Source: Atypon-hosted journal article supplement (doi:10.1176/appi.ps.201500457), 2016-11-15
Supplement: appi.ps.201500457.ds001.pdf [file appi.ps.201500457.ds001.pdf]

## ONLINE APPENDIX

### **Expressed Emotion and Subjective Knowledge about Mental Illness in Relatives of Patients with Severe Mental Disorders: Effects of “Family to Family” Psychoeducation Program in Mexico City.**

#### *Additional results*

The group of relatives that were excluded from the analyses (whenever the post-test assessment and the whole information required for this study was not completed or when class attendance was below 80%) share similar overall socio-demographic characteristics compared to the group of relatives that were included in the final study sample.

Nevertheless, these groups differed in age ( $t=2.678$ ;  $p=.008$ ) and in patient diagnosis ( $X^2=20.54$ ;  $df=4$ ;  $p=.0004$ ); the excluded group is conformed by young people and with an increase presence of affective disorders in their families when compared to the final sample

The following table show the detail results of differences between relatives' levels of EE components and SKD at pre-test and post-test with comparison by sex and age of the relative and patient diagnosis.

**Online Appendix Tables:**

Table 1. Differences in criticism, emotional over-involvement, overall expressed emotion and subjective knowledge about mental illness between pre-test vs. post-test by sex and age of relative and patient diagnosis (N=230).

|                          | <b>Pre-test vs. Post-test</b> |          |          |                                   |          |          |                          |          |          |                                                  |          |          |
|--------------------------|-------------------------------|----------|----------|-----------------------------------|----------|----------|--------------------------|----------|----------|--------------------------------------------------|----------|----------|
|                          | <b>Comparison</b>             |          |          |                                   |          |          |                          |          |          |                                                  |          |          |
|                          | <b>Criticism</b>              |          |          | <b>Emotional over-involvement</b> |          |          | <b>Expressed Emotion</b> |          |          | <b>Subjective knowledge about mental illness</b> |          |          |
|                          | <b>t</b>                      | <b>p</b> | <b>d</b> | <b>t</b>                          | <b>p</b> | <b>d</b> | <b>t</b>                 | <b>p</b> | <b>d</b> | <b>t</b>                                         | <b>p</b> | <b>d</b> |
| <b>Sex</b>               |                               |          |          |                                   |          |          |                          |          |          |                                                  |          |          |
| Male                     | 1.7                           | .09      | .23      | 2.5                               | .017     | .37      | 2.3                      | .026     | .32      | -6.9                                             | .000     | 1.19     |
| Female                   | 7.5                           | .000     | .40      | 6.5                               | .000     | .40      | 8.1                      | .000     | .59      | -14.9                                            | .000     | 1.27     |
| <b>Age of relative</b>   |                               |          |          |                                   |          |          |                          |          |          |                                                  |          |          |
| 20-44                    | 5.1                           | .000     | .55      | 4.7                               | .000     | .48      | 5.9                      | .000     | .59      | 5.1                                              | .000     | 1.13     |
| 45-65                    | 5.2                           | .000     | .39      | 4.6                               | .000     | .34      | 5.5                      | .000     | .40      | 13.4                                             | .000     | -1.25    |
| > 65                     | 2.4                           | .024     | .40      | 2.6                               | .013     | .41      | 3.1                      | .004     | .47      | 4.0                                              | .000     | .94      |
| <b>Patient diagnosis</b> |                               |          |          |                                   |          |          |                          |          |          |                                                  |          |          |
| Undefined                | 2.7                           | .010     | .41      | 3.0                               | .004     | .45      | 3.4                      | .002     | .49      | 7.5                                              | .000     | 1.10     |
| Psychotic disorder       | 5.6                           | .000     | .47      | 4.5                               | .000     | .38      | 5.9                      | .000     | .49      | 11.4                                             | .000     | 1.37     |
| Affective disorder       | 3.7                           | .000     | .38      | 4.3                               | .000     | .47      | 5.0                      | .000     | .48      | 7.9                                              | .000     | 1.23     |
| Anxiety disorder         | .80                           | .44      | .17      | .70                               | .49      | .17      | .87                      | .041     | .19      | 2.3                                              | .035     | .98      |
| Personality disorder     | 1.4                           | .20      | .40      | .88                               | .40      | .22      | 1.3                      | .23      | .33      | 2.5                                              | .40      | .90      |

Interpretation of Cohen's *d* effect sizes: small, *d* =.2 (small); *d* =.5 (medium) and *d* =.8 (large)

### **Online Appendix References:**

- Barrowclough C, Hooley JM: Attributions and expressed emotion: a review.  
Clinical Psychology Review 23: 849–880, 2003
- Brown GW, Bailey JLT, Wing JK: Influence of family life on the course of schizophrenic disorders: A replication. British Journal of Psychiatry 121: 241-258, 1972
- Dixon L, McFarlane W, Lefley H et al: Evidence-based practices for services to families of people with psychiatric disabilities. Psychiatric Services 52: 903-910, 2001
- Dixon L, Lucksted A, Stewart B et al: Outcomes of the peer-taught 12-week Family-To-Family education program for severe mental illness. Acta Psychiatrica Scandinavica 109: 207–215, 2004
- Eisner LR, Johnson SL: An acceptance-based psycho-education intervention to reduce expressed emotion in relatives of bipolar patients. Behavior Therapy 39: 375-385, 2008
- Kuipers E: Time for a separate psychosis caregiver service? Journal of Mental Health 19: 401–4, 2010
- Lucksted A, Stewart B, Forbes C: Benefits and changes for Family to Family graduates. American Journal of Community Psychology 42: 154–166, 2008
- Lucksted A, Medoff D, Burland J et al: Sustained outcomes of a peer-taught family education program on mental illness. Acta Psychiatrica Scandinavica 127: 279–286, 2013
- Magana AB, Goldstein JM, Karno M et al: A brief method for assessing expressed emotion in relatives of psychiatric patients. Psychiatry Research 17: 203–212, 1986
- Pickett-Schenk SA, Bennett C, Cook JA et al: Changes in caregiving satisfaction and information needs among relatives of adults with mental illness: results of a

- randomized evaluation of a family-led education intervention. *American Journal of Orthopsychiatry* 76: 545–553, 2006
- Ramírez García JI, Wood JM, Hosch HM et al: Predicting psychiatric rehospitalizations: The role of Latino versus European American ethnicity. *Psychological Services* 1: 147–157, 2004.
- Reichhart T, Pitschel-Waltz G, Kissling W, Bäuml J, Schuster T, Rummer-Kluge C. Gender differences in patient and caregiver psychoeducation for schizophrenia. *European Psychiatry* 25: 39-46, 2010.
- Rummel CB, Hansen WP, Helbig A, Pitschel-Walz G, Kissling W. Peer-to-peer psychoeducation in schizophrenia: a new approach. *Journal of Clinical Psychiatry* 66; 1580-1585, 2005.
- Smith JV, Birchwood MJ: Specific and non-specific effects of educational interventions with families of schizophrenic patients. *The British Journal of Psychiatry* 150: 645-652, 1987
- Snowden LR: Explaining mental health treatment disparities: Ethnic and cultural differences in family involvement. *Culture Medicine and Psychiatry* 31: 389–402, 2007
- Uehara T, Kawashima Y, Goto M et al: Psychoeducation for the families of patients with eating disorders and changes in EE: A preliminary study. *Comprehensive Psychiatry* 42: 132-138, 2001
- Weisman AG, Nuechterlein K H, Goldstein MJ et al: Expressed emotion, attributions, and schizophrenia symptoms dimensions. *Journal of Abnormal Psychology* 107: 355–359, 1998
